# Supplementary material for: Fabrication of planar heterojunction CsPbBr2I perovskite solar cells using ZnO as an electron transport layer and improved solar energy conversion efficiency
Source: Royal Society of Chemistry journal article supplement (doi:10.1039/c8nj02238k), 2018-01-01
Supplement: c8nj02238k1.pdf [file c8nj02238k1.pdf]

## Supporting Information

### Fabrication of planar heterojunction CsPbBr<sub>2</sub>I perovskite solar cell using ZnO as electron transport layer & improved solar energy conversion efficiency

Muhammad Aamir,<sup>a,d</sup> Tham Adhikari,<sup>a</sup> Muhammad Sher,<sup>b</sup> Neerish Revaprasadu,<sup>c</sup> Waqas Khalid,<sup>d</sup> Javeed Akhtar<sup>\*d</sup> and Jean-Michel Nunzi<sup>\*a,e</sup>

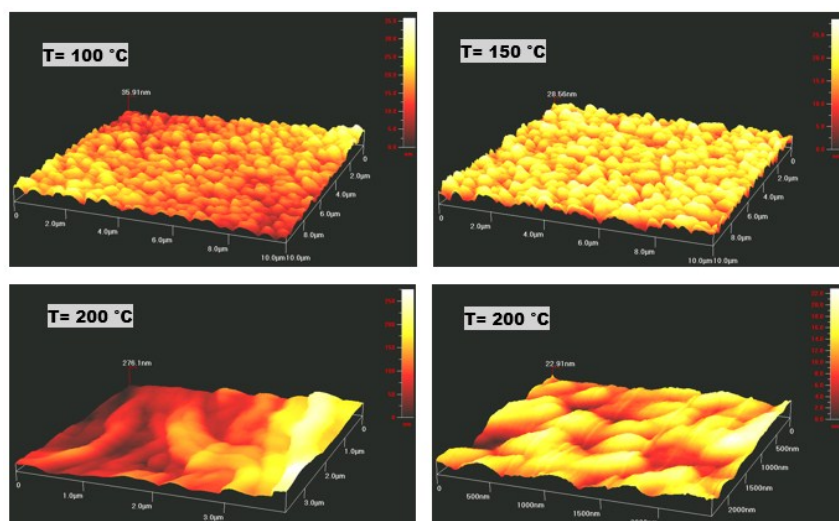

**Figure S1 (a-d).** AFM images of as-deposited ZnO layer on ITO glasses annealed at 100 °C, 150 °C and 200 °C for 30 minutes.

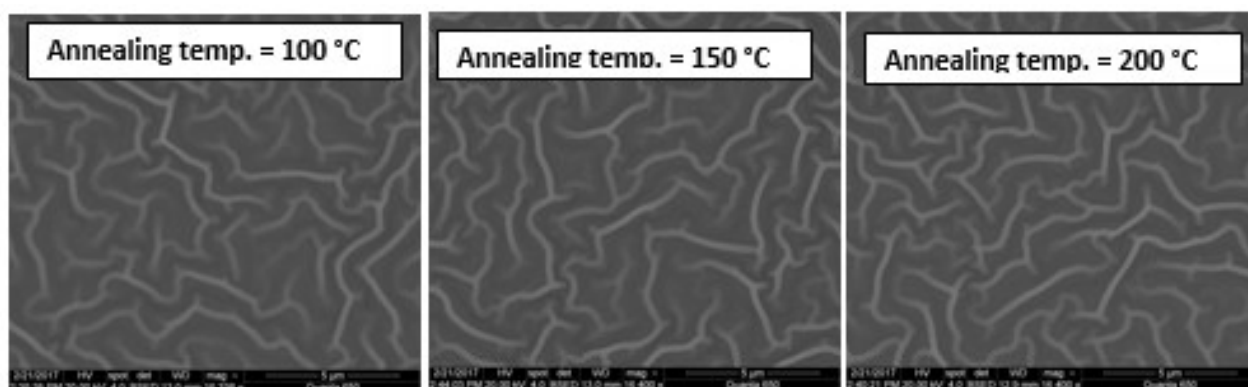

**Figure S2.** SEM image of ZnO deposited on ITO glass and annealed at 100 °C, 150 °C and 200 °C.

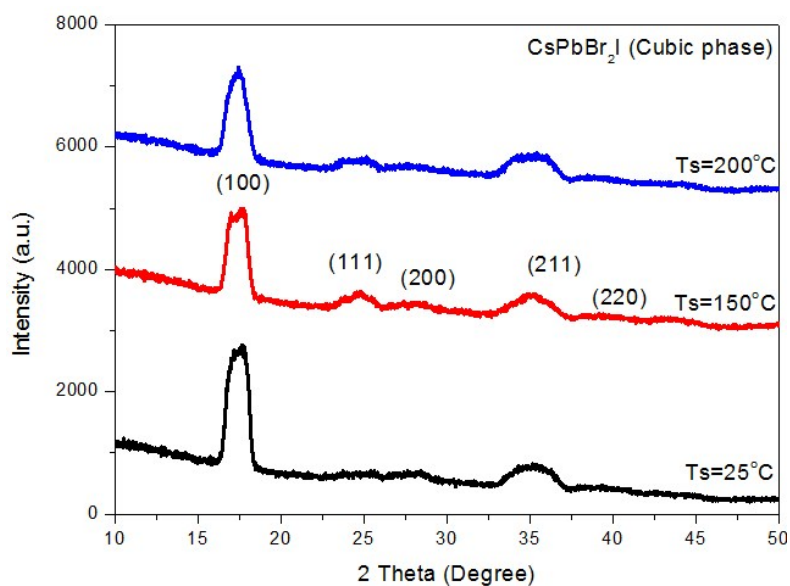

**Figure S3.** P-XRD spectra of as-deposited CsPbBr<sub>2</sub>I perovskite at substrate temperature (Ts) at 25 °C, 150 °C and 200 °C.

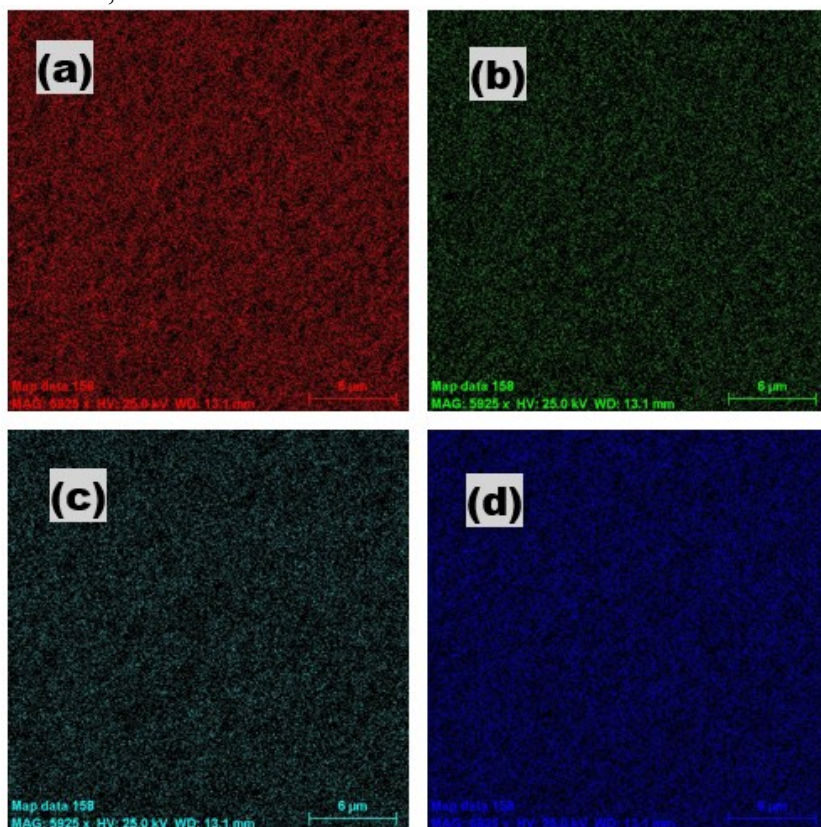

**Figure S4.** EDX mapping of CsPbBr<sub>2</sub>I showing the well distribution of (a) Cs, (b) Pb, (c) Br and (d) I in the interrogated area of film.

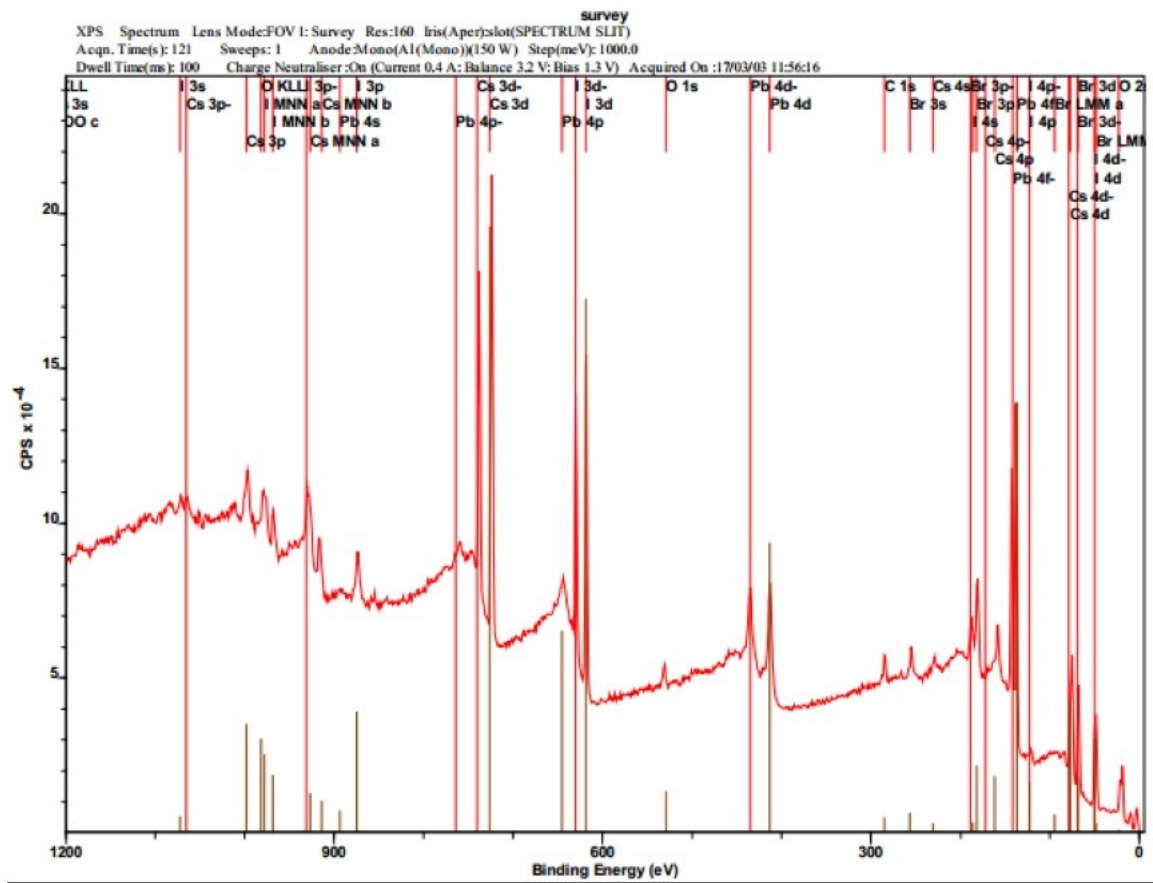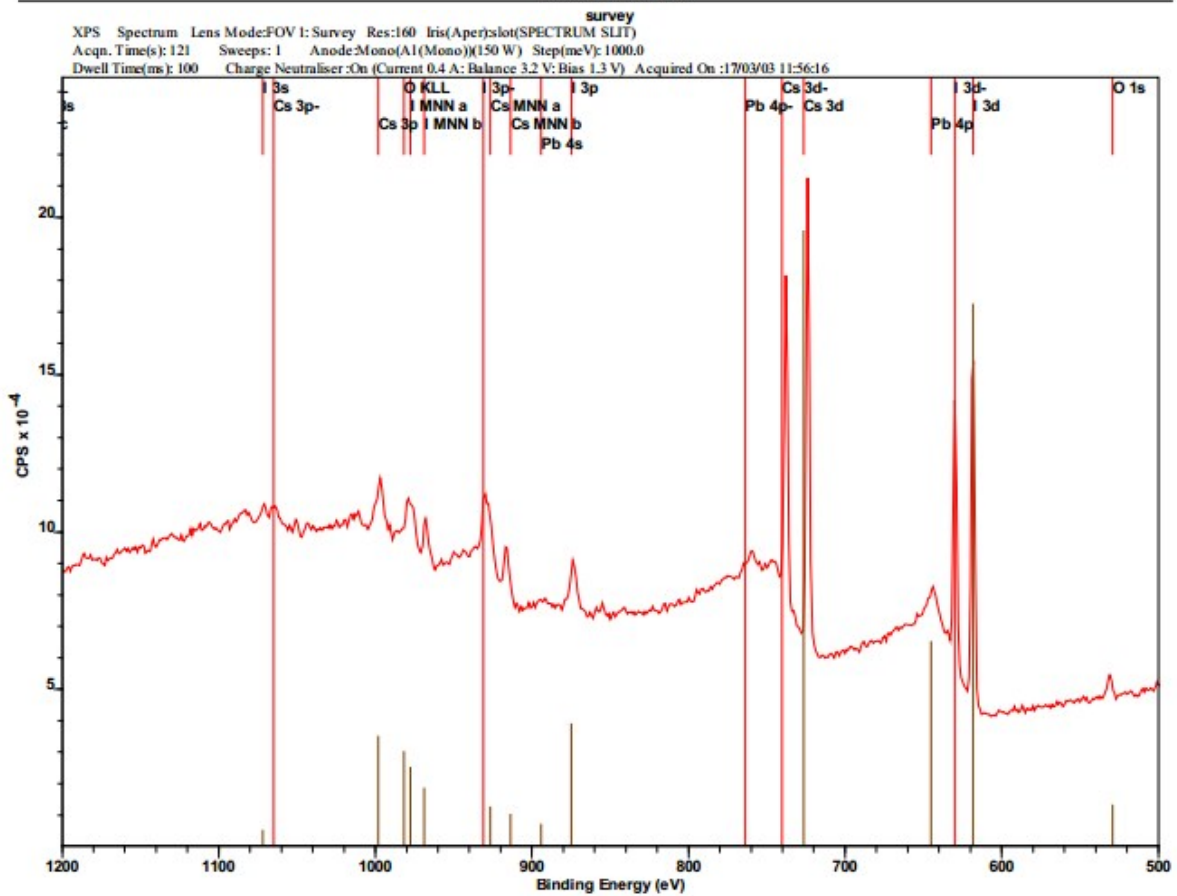



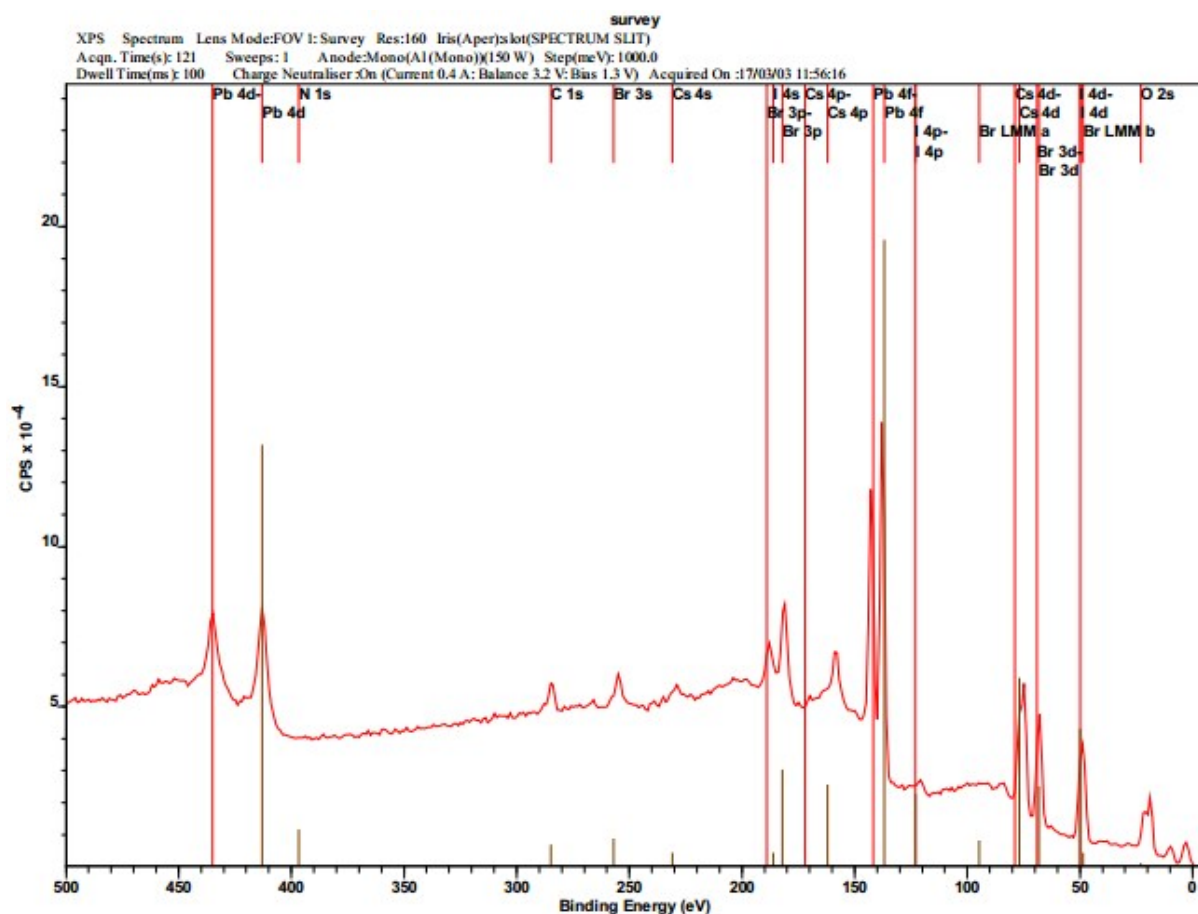

**Figure S5 (a-d).** High resolution XPS analyses of CsPbBr<sub>2</sub>I corresponding to Cs, Pb, Br and I.

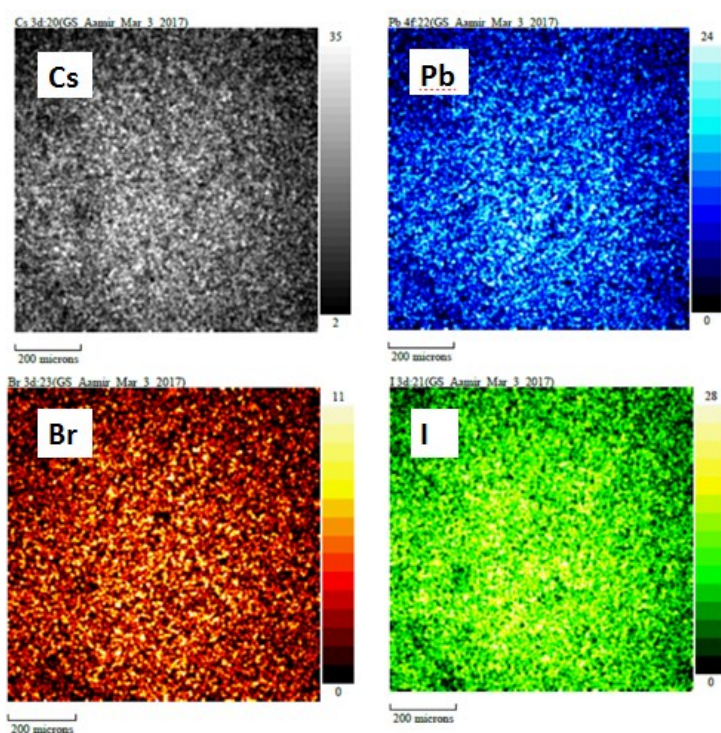

**Figure S6.** XPS Q-mapping of CsPbBr<sub>2</sub>I perovskite thin film deposited at substrate temperature of 150 °C.

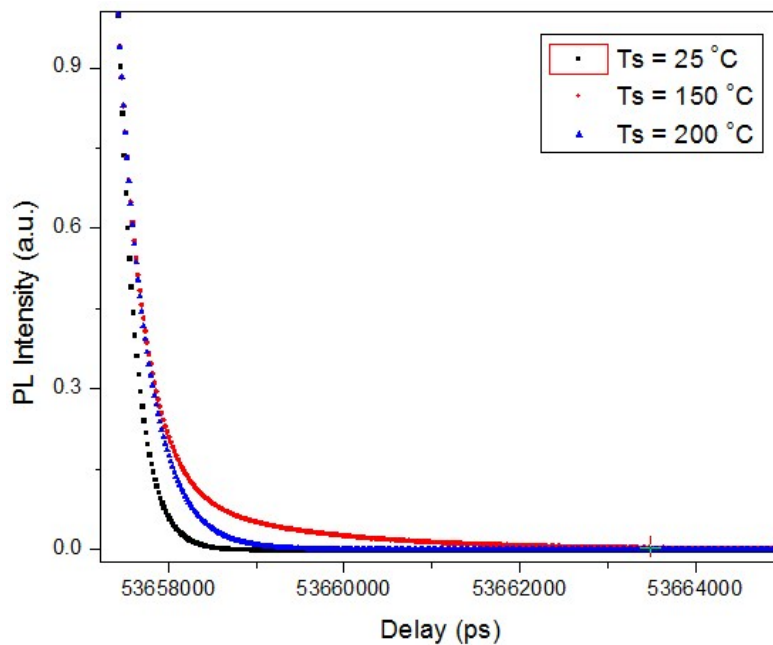

**Figure S7.** Life time photoluminescence of CsPbBr<sub>2</sub>I perovskite layers deposited at Ts = 25 °C, 150 °C and 200 °C.

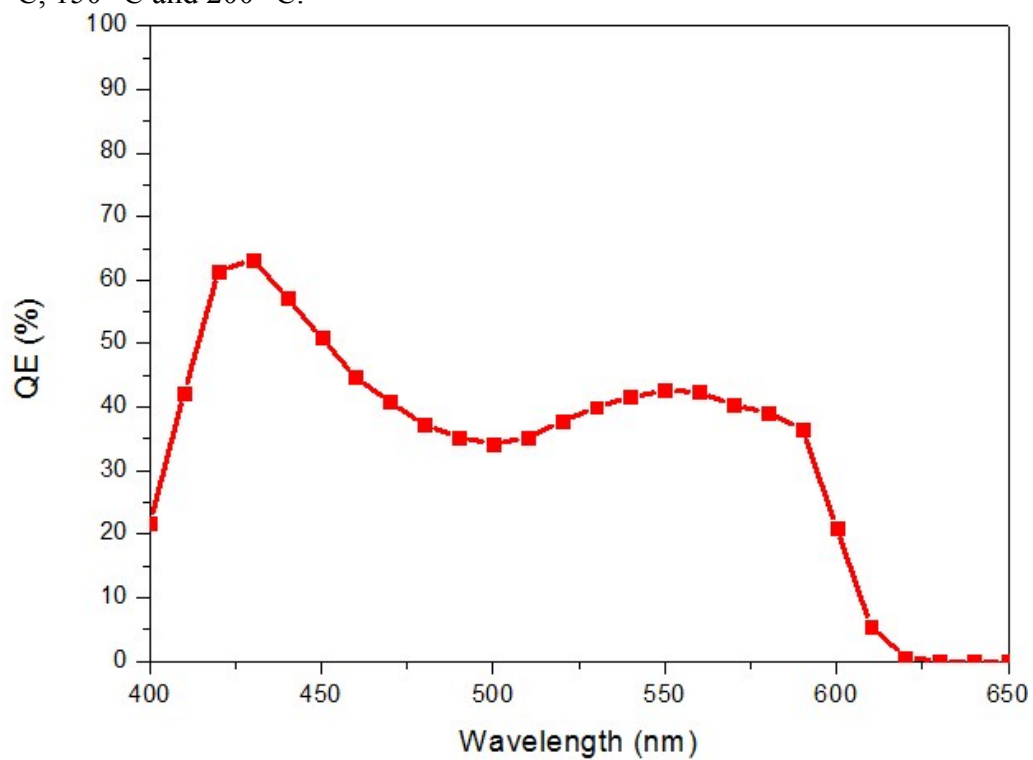

**Figure S8.** IPCE (QE) of the best device deposited at Ts = 150 °C.

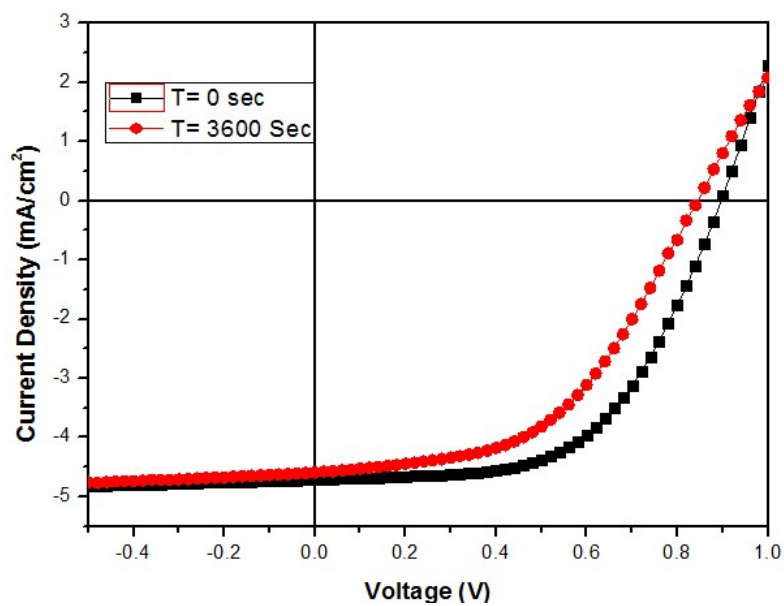

**Figure S9.** J-V curve of CsPbBr<sub>2</sub>I device before and after exposure to continuous illumination of 3600 second to assess photostability.

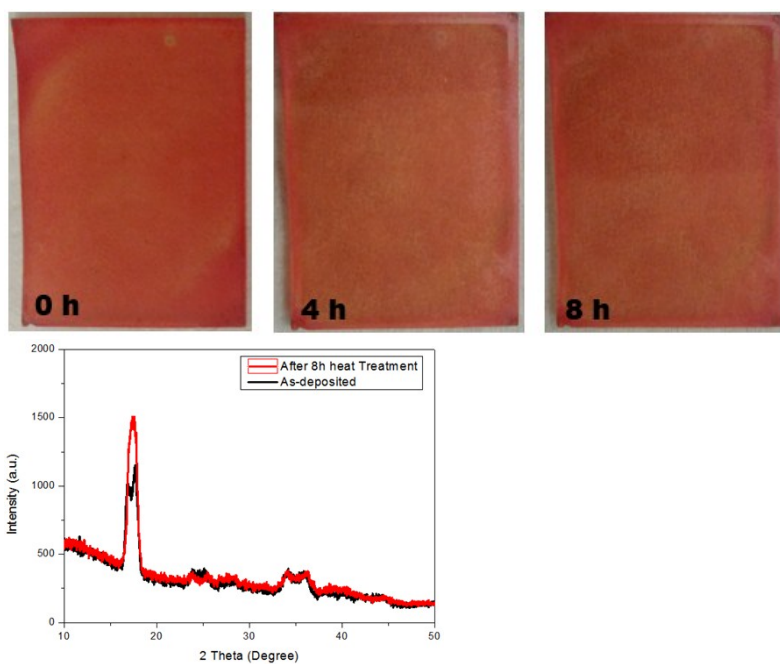

**Figure S10.** P-XRD spectra and pictures of thermally treated films of ZnO/CsPbBr<sub>2</sub>I at 100 °C, to assess the thermal stability of CsPbBr<sub>2</sub>I perovskite.
